# Supplementary material for: Relieving immunosuppression during long-term anti-angiogenesis therapy using photodynamic therapy and oxygen delivery
Source: Royal Society of Chemistry journal article supplement (doi:10.1039/d0nr02750b), 2020-01-01
Supplement: d0nr02750b1.pdf [file d0nr02750b1.pdf]

## Supporting Information

### Relieving immunosuppression during long-term anti-angiogenesis therapy using photodynamic therapy and oxygen delivery

Qianyuan He<sup>†a</sup>, Zhanjie Zhang<sup>†a</sup>, Haojie Liu<sup>b</sup>, Zhan Tuo<sup>a</sup>, Jie Zhou<sup>a</sup>, Yan Hu<sup>a</sup>, Yajie Sun<sup>a</sup>, Chao Wan<sup>a</sup>, Zushun Xu<sup>b</sup>, Jonathan F. Lovell<sup>c</sup>, Desheng Hu<sup>\*d</sup>, Kunyu Yang<sup>\*a</sup>, Honglin Jin<sup>\*a</sup>

<sup>a</sup> Cancer Center, Union Hospital, Tongji Medical College, Huazhong University of Science and Technology, Wuhan 430022, China.

<sup>b</sup> Hubei Collaborative Innovation Center for Advanced Organic Chemical Materials, Ministry of Education Key Laboratory for the Green Preparation and Application of Functional Materials, Hubei Key Laboratory of Polymer Materials, Hubei University, Wuhan, Hubei, 430062, China.

<sup>c</sup> Department of Biomedical Engineering, University at Buffalo, State University of New York, Buffalo, New York 14260, USA

<sup>d</sup> Department of Integrated Traditional Chinese and Western Medicine, Union Hospital, Tongji Medical College, Huazhong University of Science and Technology, Wuhan 430022, China

\*E-mail: Honglin Jin, jin@hust.edu.cn; Kunyu Yang, yangkuny@medmail.com.cn; Desheng Hu, desheng.hu@hust.edu.cn

† Qianyuan He and Zhanjie Zhang contributed equally.

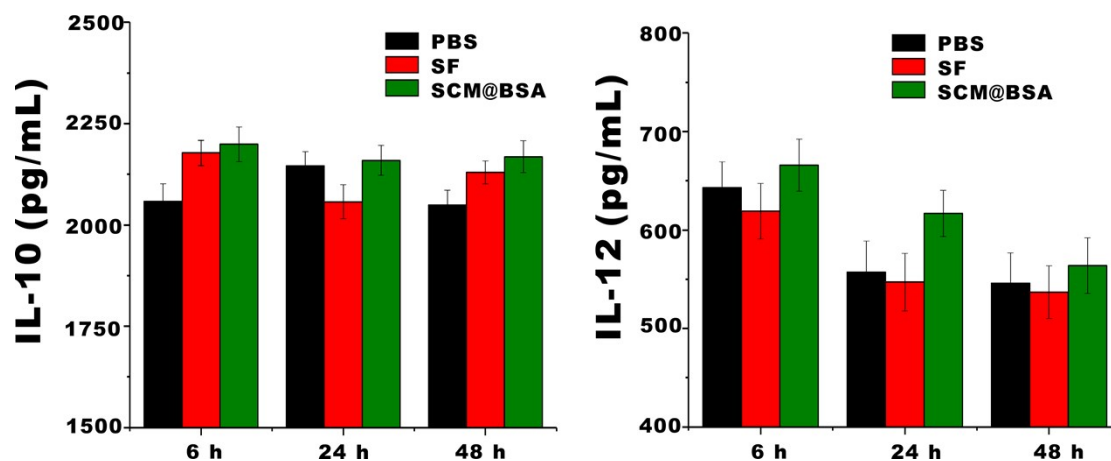

Figure S1. The levels of IL-10 and IL-12 in peripheral blood. Data are presented as the mean  $\pm$  SEM (n = 5).

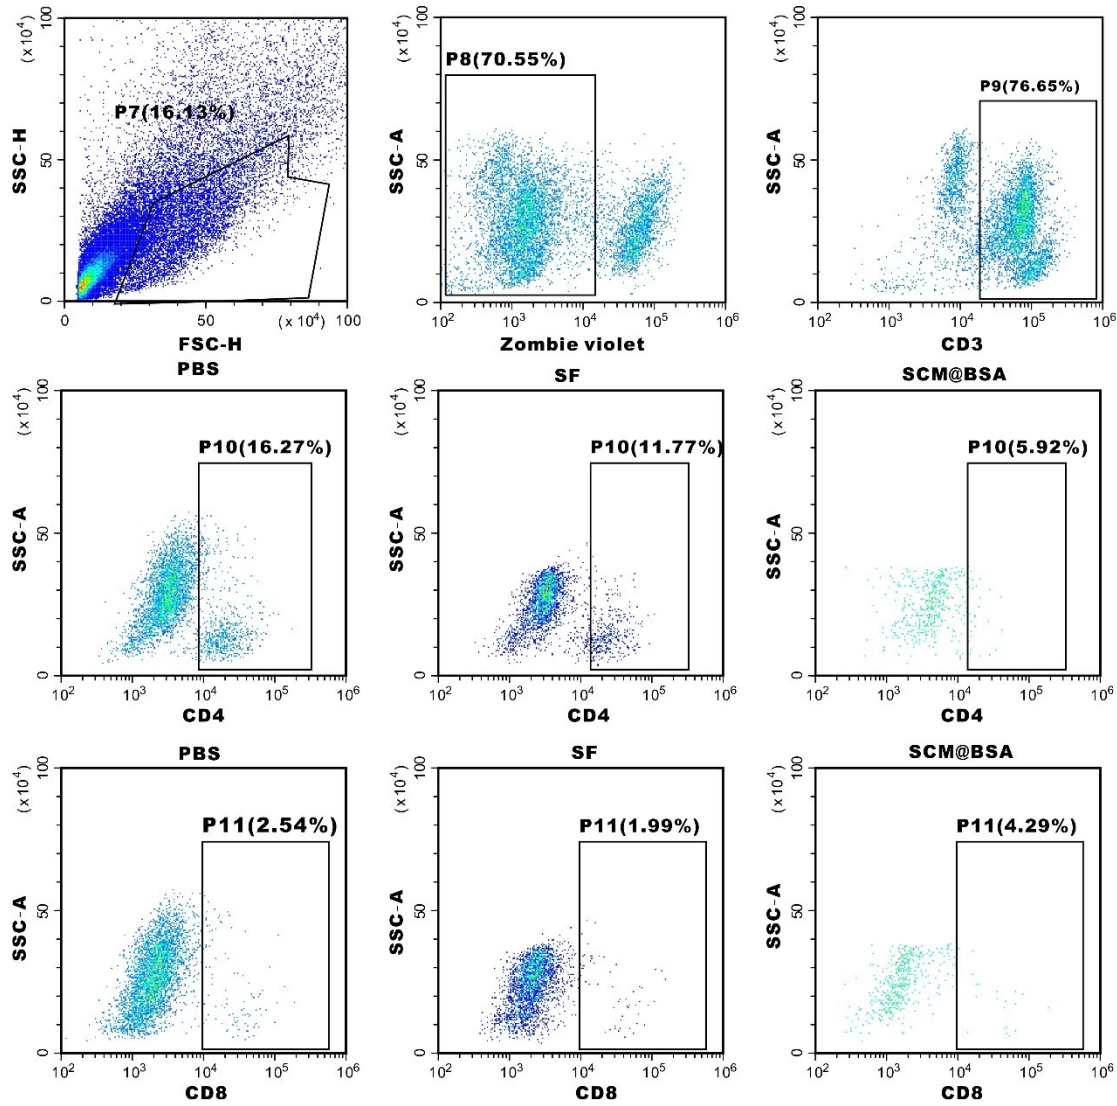

Figure S2. Gating strategy for flow cytometric analysis of T cells.

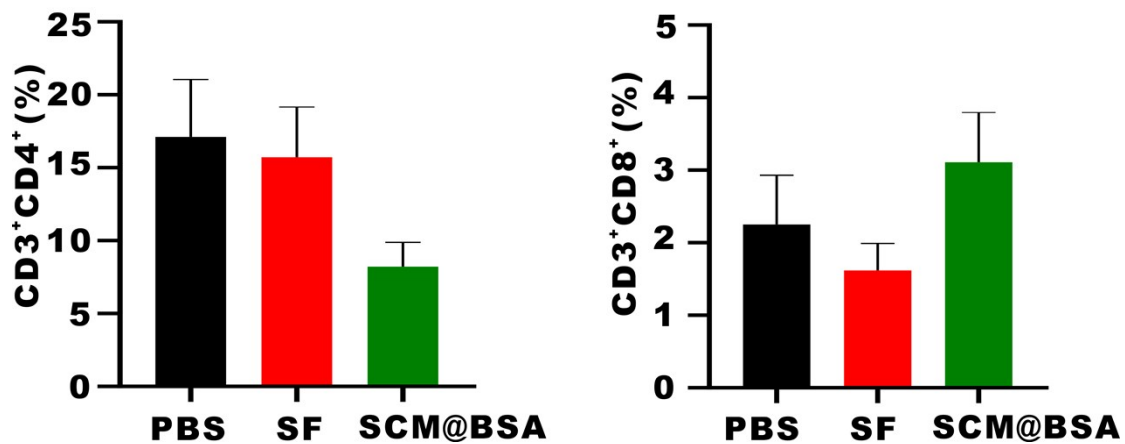

Figure S3. Flow cytometric analysis of the percentages of CD3+CD8+ and CD4+CD8+ in different group. Data are presented as the mean  $\pm$  SEM (n=6).
